# Supplementary material for: A Systematic Review of Instruments to Assess Organizational Readiness for Knowledge Translation in Health Care
Source: PubMed Central journal article supplement (PMC4256226; doi:10.1371/journal.pone.0114338), 2014-12-04
Supplement: pone.0114338.s001.pdf [file pone.0114338.s001.pdf]

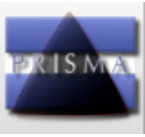

# PRISMA 2009 Flow Diagram

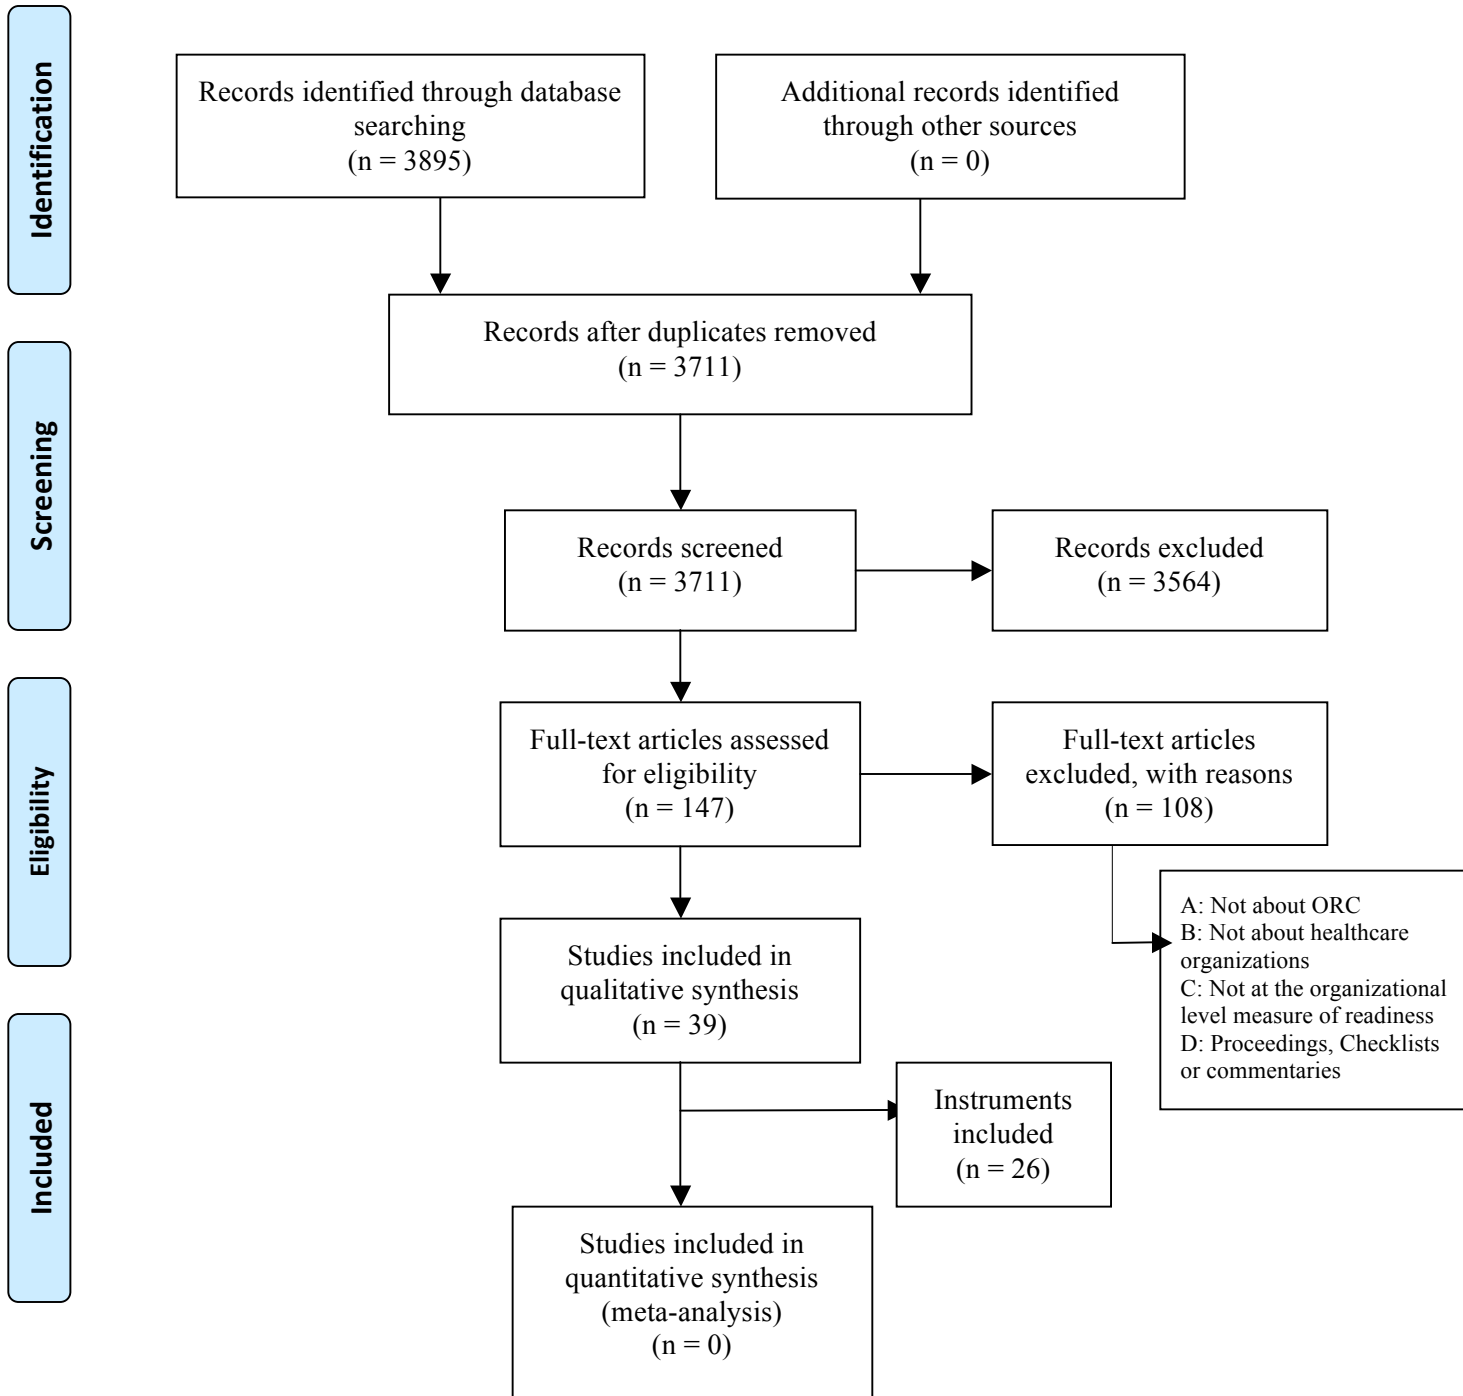

Figure 1

From: Moher D, Liberati A, Tetzlaff J, Altman DG, The PRISMA Group (2009). Preferred Reporting Items for Systematic Reviews and Meta-Analyses: The PRISMA Statement. PLoS Med 6(6): e1000097. doi:10.1371/journal.pmed1000097

For more information, visit [www.prisma-statement.org](http://www.prisma-statement.org).
